# Supplementary material
Source: PubMed Central journal article supplement (PMC6342813)

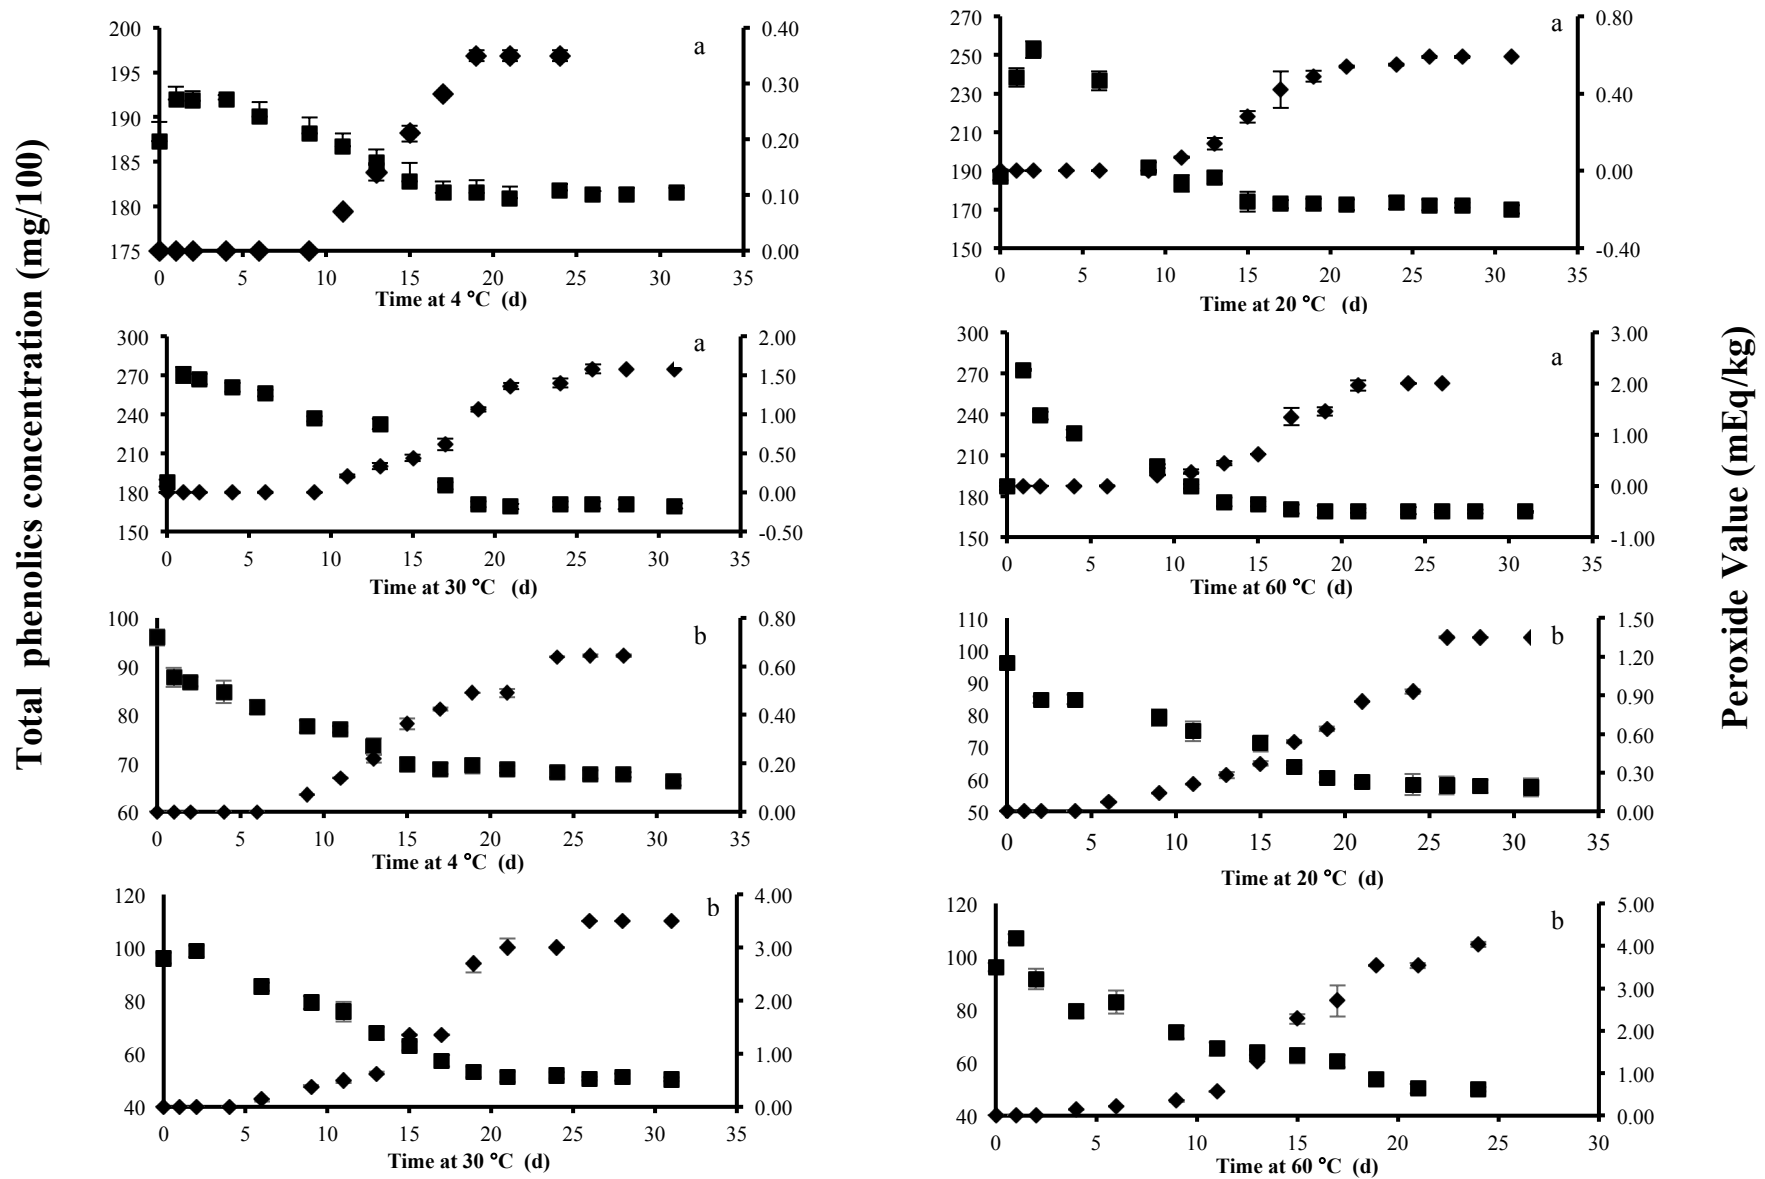

Fig. 1S

Supplement: 13197_2018_3510_MOESM1_ESM.pdf [file 13197_2018_3510_MOESM1_ESM.pdf]

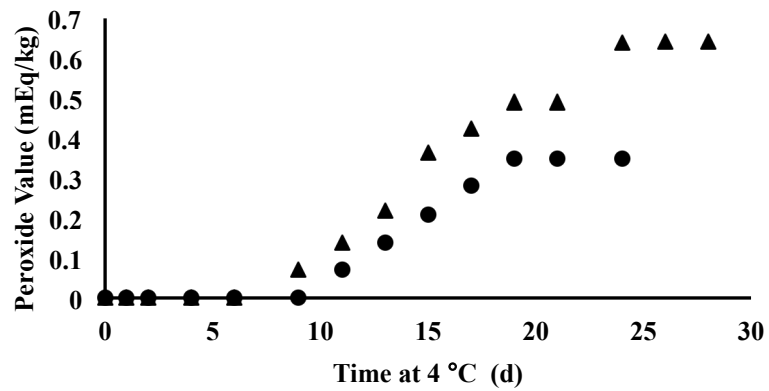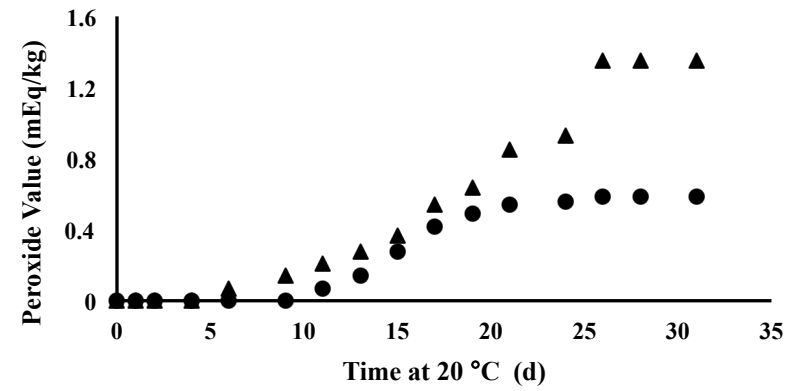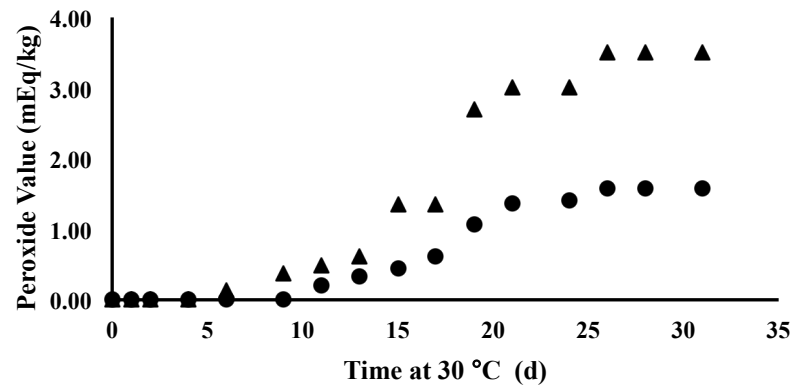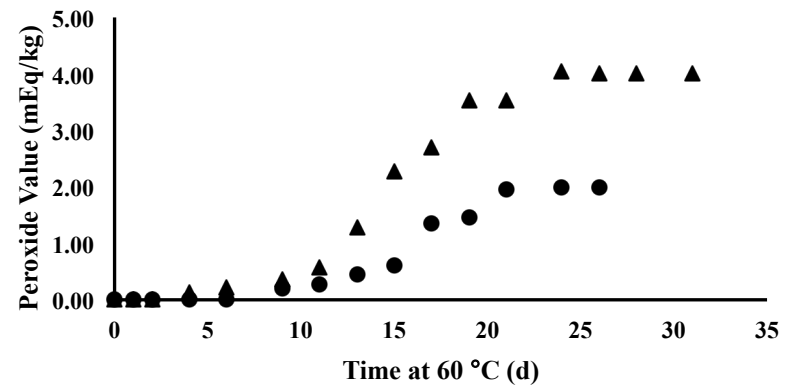

Fig. 2S

Supplement: 13197_2018_3510_MOESM2_ESM.pdf [file 13197_2018_3510_MOESM2_ESM.pdf]
